# Title Page

## **Abrupt permafrost thaw triggers microbial bloom and increased activity of**

## **microbial predators**

### Authors

Maria Scheel<sup>1</sup>, Athanasios Zervas<sup>2</sup>, Alexander Tøsdal Tveit<sup>3</sup>, Ruud Rijkers<sup>4</sup>, Flemming Ekelund<sup>5</sup>,  
Carsten Suhr Jacobsen<sup>2</sup>, Torben Røjle Christensen<sup>1,5</sup>

### Corresponding author

Maria Scheel; [maria.scheel@ecos.au.dk](mailto:maria.scheel@ecos.au.dk); +31 618 798369

Aarhus University, Frederiksborgvej 399, 4000 Roskilde, Denmark

### Affiliations

1 Department of Ecoscience, Aarhus University, Roskilde, Denmark

2 Department of Environmental Science, Aarhus University, Roskilde, Denmark

3 Department of Arctic and Marine Biology, University of Tromsø, Tromsø, Norway

4 Department of Ecological Science, Vrije Universiteit Amsterdam, Amsterdam, The  
Netherlands

5 Department of Biology, Copenhagen University, Copenhagen, Denmark

6 Oulanka Research Station, Oulu University, Oulu, Finland

## Keywords

Permafrost; transcriptomics; abrupt erosion; Bacteroidota; Protozoa; microbial bloom

## Abstract

Permafrost soils store a substantial part of the global soil carbon, but due to global warming, abrupt erosion and consecutive thaw make these carbon stocks vulnerable to microbial decomposition into greenhouse gases. Although in temperate systems trophic interactions promote soil carbon storage, their role in Arctic permafrost microbiomes, especially during thaw, remains largely unknown. Here, we investigated the microbial response to *in situ* thawing and rapid permafrost erosion. We sequenced the total RNA of a 1 m deep soil core from an active abrupt erosion site to analyse the microbial community in the active layer soil, recently thawed and intact permafrost, consisting of up to 26 500-year-old material. We found maximum RNA:DNA ratios in recently thawed permafrost, indicating upregulation of protein biosynthesis upon thaw. At the same depths, the relative abundance of several prokaryotic orders, including Sphingobacteriales, Burkholderiales, and Nitrosomonadales increased in relative abundance. Bacterial predators were mainly dominated by Myxococcales. Protozoa were overall less abundant but doubled in relative abundance between the active layer and recently thawed permafrost. Cercozoa, Amoebozoa, and Ciliophora were the most abundant protozoan predators, replacing myxobacteria at deeper thaw depths. Overall, connections between the active layer and especially upper thawed layers were visible and suggest migration, while no layer formed a distinct community. Our findings highlight the importance of predation and population dynamics as well as the rapid development of a microbial bloom in abruptly thawing permafrost.

## 1. Introduction

Permafrost soils encompass over half of all global soil carbon while harbouring unique but poorly described microbial communities under constant freezing conditions (Hugelius et al., 2014; Tarnocai et al., 2009). Permafrost is ground frozen perennially, for at least two years, and consists of a seasonally thawing active layer, the permanently frozen permafrost, and an interjacent zone of progressing thaw. Additional to gradual thaw, global warming causes ground ice to melt and soils to collapse abruptly, affecting up to half of all permafrost carbon by 2100 (Turetsky et al., 2020). Hence, permafrost carbon increasingly becomes available to deeper rooting vegetation and microbial decomposition. However, predictions of future carbon release from permafrost are uncertain due to high spatial variability, but also knowledge gaps related to microbial contributions to fluxes (Elberling et al., 2013; IPCC, 2021).

The set of microorganisms, the microbiome, of frozen permafrost differs significantly from overlaying thawed soils. Seasonally fluctuating temperature selects for highly resilient taxa with high growth rates and effective carbon use (Bardgett and Caruso, 2020). In contrast, permafrost - due to stable freezing temperatures - harbours liquid water only in salty brine channels and stores the majority of nutrient-poor carbon as highly recalcitrant organic matter (Parmentier et al., 2017). These conditions select for highly resistant taxa – slow growth rates and higher metabolic versatility (Allison and Martiny, 2008; Shade et al., 2012). While thawed soil communities are often functionally redundant (Nannipieri et al., 2017), permafrost communities have been suggested to be functionally constrained due to environmental limitations and slow reproduction rates (Monteux et al., 2020). Possible microbial responses to thaw include the termination of former resting stages, such as cysts and endospores (Lennon

and Jones, 2011), which upon suitable thermal and moisture conditions can lead to local microbial blooms. Alternatively, the active layer microbiome can colonize thawed layers through cryoturbation (Gittel et al., 2014a), active layer detachments (Inglese et al., 2018), or root growth (Monteux et al., 2020). These migrations, or coalescence effects, can increase carbon and nitrogen release from thawed and inoculated permafrost soil (Monteux et al., 2020).

Soil microbial biodiversity highly influences the microbiome's resilience toward climate extremes (Bardgett and Van Der Putten, 2014; Griffiths and Philippot, 2013). Furthermore, it has previously been observed that also complexity or quality, and quantity of trophic relations inter- and intrakindom, especially including predation of bacteria (Geisen et al., 2021; Thakur and Geisen, 2019) The decrease of soil biodiversity in temperate systems has been linked to increased losses of carbon to the atmosphere, but within Arctic soil metacommunity, little research has been conducted on this topic.

While the role of microbial predators in temperate soils has been studied extensively (Thakur and Geisen, 2019), bacteria-protozoan interactions in thawing permafrost have not been thoroughly explored, although microbial predator presence has been documented (Malard and Pearce, 2018; Scheel et al., 2022; Schostag et al., 2019; Shatilovich et al., 2009). Previous research on thawing permafrost soil has included incubation or gradual thaw gradients, but few microbial studies were conducted on abrupt permafrost erosion sites. However, research has focused on only a few sites extensively, although biogeography of permafrost microorganisms is spatially highly variably, leaving particularly Greenland highly understudied (Malard and Pearce, 2018; Metcalfe et al., 2018). Finally, remote Arctic microbial work is often limited to

DNA-based approaches, such as amplicon sequencing, as local processing or transport of RNA is rarely possible. The use of ribosomal RNA (rRNA<sup>1</sup>) community analysis has the clear advantage of decreasing methodological, such as polymerase chain reaction (PCR), biases when utilizing DNA and allowing an understanding of the putatively active community as opposed to metagenomic studies.

Here, we overcome these limitations by sampling an *in situ* abrupt erosion site for the first metatranscriptomic analysis of the total active microbial community of Greenlandic permafrost. We hypothesise that the freshly thawed soils support fast-growing species that either invaded from the active layer or consist of reactivated permafrost resting stages. We furthermore test if trophic dynamics impact the community more than abiotic soil properties. These insights can help to understand the spatiotemporal and trophic dynamics of permafrost microbial ecology and estimate the ecological response of warming and rapid erosion as a potential key driver of both permafrost carbon and endemic taxa vulnerability.

---

<sup>1</sup> Abbreviations:

rRNA - ribosomal RNA  
mRNA - messenger RNA  
PCR - polymerase chain reaction  
AL- active layer  
TZ - transition zone  
PF - permafrost  
SOM - soil organic matter  
H<sub>2</sub>O - soil moisture  
AY - young-aged material  
AM - medium-aged material  
AO - old-aged material  
NMDS - non-metric multidimensional scaling  
SAR - supergroup Stramenopiles-Alveolata-Rhizaria

## 2. Materials and Methods

### 2.1. Soil sampling

Sampling took place within a recent thermal erosion gully situated in Zackenberg valley, NE Greenland (Fig. 1 A-B), as described before (Christensen et al., 2020; Scheel et al., 2022). Below the active layer (AL) at 40 cm depth, an ice lens had melted in 2019, creating a first transition zone depth until 70 cm depth (TZ1) that deepened until 90 cm depth in 2020 (TZ2), while below 90 cm depth intact permafrost (PF) persisted (Fig. 1 C-D). In 2020, we sampled soil down to 100 cm depth aseptically in triplicate per 10 cm horizon. The samples were stored at  $-20^{\circ}\text{C}$  until transported frozen to Denmark, where they were stored at  $-80^{\circ}\text{C}$ .

### 2.2. Physicochemical soil analysis

Physical soil properties from thawed triplicates per 10 cm were determined as described by Scheel and colleagues (Scheel et al., 2022). In short, weight-based relative soil moisture ( $\text{H}_2\text{O}$ ) and organic carbon content (SOM) were calculated by air-drying at  $70^{\circ}\text{C}$  for 48 h and burning at  $450^{\circ}\text{C}$  for 2 h. Radiocarbon dating was performed on sieved macrofossils. For the pH measurement, 10 ml of airdried soil were shaken for 1h in 50 ml of 1 M KCl in technical triplicates using a Mettler Toledo FiveEasy Plus<sup>TM</sup> pH Meter (Mettler Toledo GmbH, GieBen, Germany). The  $^{14}\text{C}$  results were split into three age categories for downstream statistical analysis: young soils (AY, until 40 cm depth), medium old soils (AM, 40–60 cm depth ranging from 2 645 to 3 770 years BP), and old soil (AO, from 60 cm depth and below with up to 26 500–year-old material Table 1).

Table 1 Soil properties include  $^{14}\text{C}$  radiocarbon dating results (\* = fM; \*\*BP), relative weight-based soil moisture ( $\text{H}_2\text{O}$ ), relative weight-based soil organic matter content (SOM), pH and layer, as defined by thawing processes as active layer (AL), deepest thaw in 2019: transition zone 1 (TZ1) and 2020: TZ2; and permafrost (PF). Extraction and sequencing output included the calculated RNA:DNA ratio based on co-extraction of nucleic acids per gram dry weight (gDW). The cumulative sum of clean total RNA sequencing reads per depth. Standard deviations for triplicates per depth are indicated where available ( $\pm$ ).

| depth [cm] | $^{14}\text{C}$ [*fM<br>**BP] | $\text{H}_2\text{O}$ [%] | SOM [%]          | pH              | layer | DNA gDW [ng/ $\mu\text{l}$ ] | RNA gDW [ng/ $\mu\text{l}$ ] | RNA:DNA         | total reads |
|------------|-------------------------------|--------------------------|------------------|-----------------|-------|------------------------------|------------------------------|-----------------|-------------|
| 0-10       | 1.04*                         | 28.80 $\pm$ 3.38         | 8.73 $\pm$ 1.82  | 4.22 $\pm$ 0.03 | AL    | 16.70 $\pm$ 7.84             | 7.15 $\pm$ 3.43              | 2.34 $\pm$ 0.43 | 1.78E+07    |
| 10-20      | 1.13*                         | 22.52 $\pm$ 0.73         | 5.39 $\pm$ 0.83  | 4.02 $\pm$ 0.05 |       | 1.65 $\pm$ 1.86              | 1.46 $\pm$ 0.17              | 1.11 $\pm$ 0.90 | 4.85E+07    |
| 20-30      | 1.16*                         | 22.05 $\pm$ 3.30         | 10.19 $\pm$ 3.22 | 4.29 $\pm$ 0.01 |       | 11.23 $\pm$ 11.43            | 1.82 $\pm$ 0.04              | 6.11 $\pm$ 0.16 | 2.25E+07    |
| 30-40      | 1.2*                          | 26.57 $\pm$ 0.83         | 13.68 $\pm$ 0.44 | 4.25 $\pm$ 0.01 |       | 3.73 $\pm$ 0.67              | 1.73 $\pm$ 0.46              | 2.18 $\pm$ 0.46 | 1.05E+08    |
| 40-50      | 2 635**                       | 7.73 $\pm$ 1.58          | 2.59 $\pm$ 0.68  | 4.63 $\pm$ 0.03 | TZ1   | 1.09 $\pm$ 1.20              | 0.81 $\pm$ 0.85              | 1.37 $\pm$ 0.73 | 2.39E+07    |
| 50-60      | 3 770**                       | 15.61 $\pm$ 6.28         | 2.93 $\pm$ 0.30  | 4.13 $\pm$ 0.02 |       | 0.22 $\pm$ 0.19              | 0.81 $\pm$ 0.21              | 0.27 $\pm$ 3.75 | 7.22E+07    |
| 60-70      | 26 500**                      | 8.72 $\pm$ 2.53          | 1.52 $\pm$ 0.16  | 4.86 $\pm$ 0.05 |       | 0.17 $\pm$ 0.23              | 0.72 $\pm$ 0.09              | 0.23 $\pm$ 4.43 | 4.90E+07    |
| 70-80      | 22 100**                      | 6.35 $\pm$ 0.60          | 1.10 $\pm$ 0.24  | 4.48 $\pm$ 0    |       | 0.04 $\pm$ 0.04              | 0.36 $\pm$ 0.62              | 0.11 $\pm$ 9.13 | 1.49E+07    |
| 80-90      | 26 200**                      | 7.96 $\pm$ 0.61          | 1.00 $\pm$ 0.20  | 4.57 $\pm$ 0.01 | TZ2   | 0.02 $\pm$ 0.04              | NA                           | NA              | 3.46E+07    |
| 90-100     | 26 200**                      | 7.80 $\pm$ 0.59          | 1.04 $\pm$ 0.26  | 4.91 $\pm$ 0.01 | PF    | 0.02 $\pm$ 0.03              | NA                           | NA              | 1.40E+07    |

### 2.3. Nucleic acid co-extraction, library preparation, and sequencing

We homogenised the flash-frozen samples in antiseptic mortars before co-extracting the total RNA and DNA of the biological replicates on up to 0.35 g frozen soil sample in technical triplicate with the NucleoBond RNA Soil Mini kit (Macherey-Nagel GmbH & Co. KG Dueren, Germany) according to the manufacturer's protocol, but including added G2 DNA/RNA Enhancer infused 1,4 mm beads (Ampliqon, Odense, Denmark). Resulting concentrations were normalised for the sample weight and used for extraction ratios of extracted RNA to DNA (RNA:DNA). The RNA was further DNase-treated, cDNA synthesised, and metabarcoded as described by Mondini and colleagues (Mondini et al., 2022). All purification and library preparation steps were executed in a dedicated PCR clean room and for all nucleic acid concentrations evaluated with the TapeStation 4150 (Agilent Technologies, Santa Clara, California, US). RIN values were low ( $1.0 \pm 0.6$ , SI Table 1); hence the samples were pooled into equimolar libraries to secure even sequencing coverage and were sequenced in-house (Department of Environmental Sciences, Aarhus University, Denmark) on a NextSeq 500 with a v2.5 high-throughput 300 cycles kit (both Illumina, San Diego, CA, United States).

### 2.4. Quality filtering, RNA sorting, and OTU mapping

Raw paired-end Illumina reads (SRA accession number: PRJNA853791) were quality-controlled with TrimGalore ([https://www.bioinformatics.babraham.ac.uk/projects/trim\\_galore/](https://www.bioinformatics.babraham.ac.uk/projects/trim_galore/)) and then sorted into small subunit (SSU) rRNA and non-rRNA bins using SortMeRNA (Kopylova et al., 2012). The SSU reads were assembled into full-length SSU rRNA contigs with MetaRib (Xue et al., 2020). These contigs were taxonomically classified as described by Anwar and colleagues (Anwar et al., 2019), using CREST (Lanzén et al., 2012) against the SILVA database v. 128 (Quast

et al., 2013), resulting in taxonomically annotated rRNA contigs abundance across 30 sample triplicates. The resulting taxonomy was utilised throughout this work.

## 2.5. Community analysis and statistical testing

We performed community analysis with the R software in the R studio environment (R Core Team, 2021; R Studio Team, 2021), utilising the phyloseq (McMurdie and Holmes, 2013) and vegan packages (Oksanen et al., 2020). Shannon (S) alpha diversity and richness (number of rRNA contigs) per sample were calculated. The significance of environmental data (<sup>14</sup>C-age, pH, SOM, H<sub>2</sub>O, and layer) was tested with the *anova* function (*PERMANOVA*, 999 permutations) on Bray-Curtis dissimilarities of relative abundance per taxa within the sample to account for different read coverage across samples. Consecutive Tukey's HSD post hoc tests were performed. Principal component analyses and non-metric multidimensional scaling (NMDS) were ordinated graphically using Bray-Curtis dissimilarities. The total community was scanned for previously documented eukaryotic and bacterial predators (Geisen et al., 2015; Petters et al., 2021).

## 3. Results

### 3.1. Sequencing success and overall community composition

Extraction of RNA and DNA was successful in all triplicates and RNA:DNA ratios indicated higher values in the transition zones (Fig. 2, SI Table 1). Overall, we obtained 49 million clean paired-end Illumina reads. In total, 1952 full-length gene rRNA contigs were constructed with an average length of 1475 bp. Annotation was complete on domain level but decreased above class level (SI Table 1). On average, 72.9% of all reads could be annotated as SSU rRNA reads

and 62.3% of the raw reads mapped against these. Overall, 1833 rRNA contigs were assigned as Bacteria, 109 rRNA contigs as Eukarya, and nine rRNA contigs as Archaea.

### 3.2. Prokaryotic community composition and distribution with depth

The prokaryotic community was dominated by Proteobacteria ( $31.4 \pm 9.6\%$  of total counts), Actinobacteria ( $15.8 \pm 7.1\%$  of total counts), Acidobacteria ( $8.6 \pm 5.3\%$  of total counts), Chloroflexi ( $6.4 \pm 4.1\%$  of total counts) and Planctomycetes ( $5.4 \pm 2.9\%$  of total counts, Fig. 3A). Additional 28 bacterial and five archaeal phyla were present and included three methanogenic rRNA contigs ( $0.03 \pm 0.01\%$  of total counts) and eight methanotrophic rRNA contigs ( $0.61 \pm 0.11\%$  of total counts). Proteobacteria were dominated by Betaproteobacteria ( $15.3 \pm 12.7\%$  of total counts) and therein by the Nitrosomonadales ( $6.2 \pm 6.6\%$  of total counts) and Burkholderiales order ( $5.1 \pm 5.0\%$  of total counts), with maximum abundances at 70 cm and 90 cm depth, respectively. Deltaproteobacteria ( $8.2 \pm 5.3\%$  of total counts) decreased with depth from 50 cm depth on, mainly controlled by Myxococcales abundances ( $6.4 \pm 4.7\%$  of total counts). Alphaproteobacteria ( $6.6 \pm 2.3\%$  of total counts), especially the Rhizobiales order ( $4.5 \pm 1.6\%$  of total counts), were abundant both at the surface and permafrost. Actinobacteria abundance decreased between 40–80 cm and reached a maximum at 90–100 cm. At the latter depth, Chitinophagia and Cytophagia were abundant, with *Cytophaga aurantiaca* as the most abundant contig, mapping  $5.0 \pm 4.0\%$  of all permafrost counts. Bacteroidetes abundance increased with depth, reaching a maximum at 70–80 cm, particularly driven by one Sphingobacteriales contig, which alone constituted  $13.3 \pm 9.3\%$  of all counts at this depth. While 980 contigs (30% of total counts) were more abundant in AL than in deeper samples, 200 of these, mainly Acidobacteria, Planctomycetes, Chloroflexi, and Myxococcales contigs, were

188 also abundant in the first transition zone, accounting together for 7.5% of all counts. In  
 189 contrast, 158 contigs were exclusively (over 90%) abundant in the active layer, including several  
 190 Planctomycetes, Acidobacteria, and Chloroflexi contigs.

191 In the transition zones, 659 contigs (53% of total counts) were more abundant than in other  
 192 layers, typified by the Nitrosomonadales and Burkholderiales orders, as well as Cercozoa and  
 193 Ciliophora contigs. Particularly, 100 contigs (9% of total counts) were more abundant in TZ2  
 194 than in any other layer, including many Sphingobacteriales contigs. Of these, 28 contigs were  
 195 more abundant in permafrost than in TZ1, of which 11 consisted of Burkholderiales contigs.

196 Table 2 Average relative abundances in % per total prokaryotic community including prokaryotes (prok; \*excluding prokaryotic predators) and their predators (= pred) per depth  
 197 horizon. These include all predatory taxa (pred), in particular the bacterial predatory (bacpred) orders Bdellovibrionales and Myxococcales, as well as eukaryotic protozoan  
 198 superkingdoms (prot). Standard deviation is given in  $\pm$ , accounting for the triplicates per depth.

| depth [cm]        | 0-10             | 10-20            | 20-30            | 30-40            | 40-50            | 50-60            | 60-70            | 70-80            | 80-90            | 90-100           |
|-------------------|------------------|------------------|------------------|------------------|------------------|------------------|------------------|------------------|------------------|------------------|
| prok*             | 68.40 $\pm$ 1.75 | 88.36 $\pm$ 0.84 | 85.27 $\pm$ 1.03 | 76.26 $\pm$ 1.18 | 70.66 $\pm$ 2.76 | 73.84 $\pm$ 5.63 | 75.76 $\pm$ 4.19 | 77.89 $\pm$ 1.43 | 74.74 $\pm$ 3.43 | 81.76 $\pm$ 3.03 |
| total pred        | 10.91 $\pm$ 0.67 | 6.85 $\pm$ 0.20  | 9.36 $\pm$ 0.04  | 16.94 $\pm$ 0.42 | 17.59 $\pm$ 2.76 | 13.83 $\pm$ 4.25 | 11.65 $\pm$ 1.88 | 7.78 $\pm$ 0.69  | 6.26 $\pm$ 0.30  | 6.06 $\pm$ 1.80  |
| bacpred           | 7.29 $\pm$ 0.74  | 5.20 $\pm$ 0.20  | 7.19 $\pm$ 0.03  | 13.71 $\pm$ 0.25 | 11.46 $\pm$ 3.37 | 7.97 $\pm$ 6.60  | 4.35 $\pm$ 1.78  | 2.14 $\pm$ 0.53  | 1.06 $\pm$ 0.13  | 2.18 $\pm$ 2.27  |
| Bdellovibrionales | 0.14 $\pm$ 0.01  | 0.11 $\pm$ 0.02  | 0.15 $\pm$ 0.01  | 0.22 $\pm$ 0.01  | 0.33 $\pm$ 0.09  | 0.27 $\pm$ 0.13  | 0.41 $\pm$ 0.07  | 0.49 $\pm$ 0.02  | 0.28 $\pm$ 0.07  | 0.16 $\pm$ 0.17  |
| Myxococcales      | 7.15 $\pm$ 0.73  | 5.09 $\pm$ 0.19  | 7.04 $\pm$ 0.04  | 13.49 $\pm$ 0.26 | 11.14 $\pm$ 3.30 | 7.70 $\pm$ 6.55  | 3.94 $\pm$ 1.71  | 1.65 $\pm$ 0.52  | 0.78 $\pm$ 0.11  | 2.02 $\pm$ 2.10  |
| <i>Haliangium</i> | 2.67 $\pm$ 0.41  | 1.69 $\pm$ 0.02  | 2.57 $\pm$ 0.24  | 5.81 $\pm$ 0.45  | 6.07 $\pm$ 2.89  | 4.65 $\pm$ 5.24  | 1.24 $\pm$ 0.60  | 0.40 $\pm$ 0.18  | 0.11 $\pm$ 0.01  | 0.66 $\pm$ 0.85  |
| <i>Polyangium</i> | 1.07 $\pm$ 0.08  | 0.59 $\pm$ 0.07  | 0.51 $\pm$ 0.01  | 1.19 $\pm$ 0.08  | 0.65 $\pm$ 0.08  | 0.37 $\pm$ 0.21  | 0.39 $\pm$ 0.16  | 0.34 $\pm$ 0.34  | 0.22 $\pm$ 0.03  | 0.34 $\pm$ 0.17  |
| protozoa          | 3.62 $\pm$ 0.60  | 1.65 $\pm$ 0.21  | 2.17 $\pm$ 0.04  | 3.23 $\pm$ 0.59  | 6.13 $\pm$ 2.15  | 5.85 $\pm$ 1.89  | 7.31 $\pm$ 1.98  | 5.64 $\pm$ 0.84  | 5.19 $\pm$ 0.47  | 3.88 $\pm$ 1.33  |
| Amoebozoa         | 1.16 $\pm$ 0.21  | 0.55 $\pm$ 0.04  | 0.67 $\pm$ 0.02  | 0.82 $\pm$ 0.17  | 1.06 $\pm$ 0.34  | 1.16 $\pm$ 0.52  | 1.09 $\pm$ 0.43  | 0.48 $\pm$ 0.15  | 0.47 $\pm$ 0.08  | 0.33 $\pm$ 0.40  |
| Excavata          | 0.34 $\pm$ 0.04  | 0.24 $\pm$ 0.05  | 0.26 $\pm$ 0.03  | 0.49 $\pm$ 0.10  | 0.59 $\pm$ 0.31  | 0.50 $\pm$ 0.06  | 0.83 $\pm$ 0.20  | 0.69 $\pm$ 0.28  | 0.54 $\pm$ 0.23  | 0.38 $\pm$ 0.22  |
| Choanoflagellata  | 0.13 $\pm$ 0.02  | 0.04 $\pm$ 0.01  | 0.07 $\pm$ 0.02  | 0.11 $\pm$ 0.03  | 0.17 $\pm$ 0.08  | 0.11 $\pm$ 0.05  | 0.12 $\pm$ 0.04  | 0.12 $\pm$ 0.05  | 0.08 $\pm$ 0.03  | 0.05 $\pm$ 0.07  |
| SAR               | 2.34 $\pm$ 0.42  | 1.12 $\pm$ 0.06  | 1.49 $\pm$ 0.02  | 2.38 $\pm$ 0.40  | 6.89 $\pm$ 1.14  | 6.66 $\pm$ 2.21  | 7.42 $\pm$ 3.02  | 7.09 $\pm$ 0.35  | 7.32 $\pm$ 0.42  | 4.96 $\pm$ 0.64  |
| Cercozoa          | 1.27 $\pm$ 0.12  | 0.76 $\pm$ 0.10  | 0.76 $\pm$ 0.06  | 1.21 $\pm$ 0.20  | 2.96 $\pm$ 1.18  | 2.80 $\pm$ 0.91  | 3.48 $\pm$ 1.07  | 2.66 $\pm$ 0.51  | 2.50 $\pm$ 0.11  | 2.09 $\pm$ 0.38  |
| Ciliophora        | 0.60 $\pm$ 0.13  | 0.13 $\pm$ 0.05  | 0.44 $\pm$ 0.05  | 0.57 $\pm$ 0.14  | 1.18 $\pm$ 0.24  | 0.98 $\pm$ 0.51  | 1.52 $\pm$ 0.68  | 1.34 $\pm$ 0.19  | 1.34 $\pm$ 0.13  | 0.71 $\pm$ 0.20  |
| Stramenopiles     | 0.10 $\pm$ 0.02  | 0.05 $\pm$ 0.01  | 0.05 $\pm$ 0.00  | 0.13 $\pm$ 0.02  | 0.23 $\pm$ 0.06  | 0.36 $\pm$ 0.10  | 0.28 $\pm$ 0.05  | 0.38 $\pm$ 0.26  | 0.31 $\pm$ 0.09  | 0.31 $\pm$ 0.10  |
| Hacrobia          | 0.03 $\pm$ 0.00  | 0.01 $\pm$ 0.00  | 0.01 $\pm$ 0.00  | 0.02 $\pm$ 0.00  | 0.03 $\pm$ 0.01  | 0.03 $\pm$ 0.02  | 0.05 $\pm$ 0.03  | 0.03 $\pm$ 0.01  | 0.03 $\pm$ 0.01  | 0.01 $\pm$ 0.02  |
| pred:prok         | 0.15 $\pm$ 0.02  | 0.08 $\pm$ 0.01  | 0.11 $\pm$ 0.00  | 0.22 $\pm$ 0.01  | 0.24 $\pm$ 0.08  | 0.19 $\pm$ 0.13  | 0.15 $\pm$ 0.06  | 0.10 $\pm$ 0.00  | 0.08 $\pm$ 0.01  | 0.07 $\pm$ 0.05  |
| prot:bacpred      | 0.50 $\pm$ 0.03  | 0.32 $\pm$ 0.03  | 0.30 $\pm$ 0.01  | 0.24 $\pm$ 0.05  | 0.55 $\pm$ 0.15  | 0.99 $\pm$ 0.53  | 1.76 $\pm$ 0.36  | 2.80 $\pm$ 1.00  | 4.91 $\pm$ 0.46  | 2.97 $\pm$ 1.80  |

199

### 3.3. Non-predatory Eukarya

Within the Archaeplastida ( $6.5 \pm 2.9\%$  of total counts), the most abundant phylum was Tracheophyta ( $5.6 \pm 2.4\%$  of total counts) accounting for 38.5% of all eukaryotic counts, dominated by Magnoliophyta rRNA contigs. The supergroup Stramenopiles-Alveolata-Rhizaria (SAR) contigs ( $4.8 \pm 2.8\%$  of total counts) on average made up 33.6% of all eukaryotic counts, increasing in the transition zones. Opisthokonta ( $1.5 \pm 2.1\%$  of total counts) abundance included Fungi, particularly Ascomycota and Basidiomycota, and Metazoa mainly at 0–10 cm and decreased with depth (Fig. 3C).

### 3.4. Bacterial and eukaryotic bacterivores abundance

Bacterivores included bacterial predators of the Deltaproteobacteria class, as well as several protozoan taxa (Fig. 3B, Table 2, for all taxonomic annotations see SI. Table 2). Myxococcales was the overall most abundant order and dominated the 140 bacterial predator rRNA contigs ( $6.0 \pm 4.5\%$  of total counts), with *Haliangium* and *Polyangium* as the most abundant genera. Especially *Haliangium* dominated ( $2.6 \pm 2.7\%$  of total counts) the boundary between the active layer and thawed permafrost at 40–50 cm depth.

The microeukaryotic protozoa included 72 rRNA contigs ( $4.5 \pm 2.1\%$  of total counts). Cercozoa ( $2.1 \pm 1.1\%$ ) and Ciliophora ( $0.9 \pm 0.5\%$ ) were most abundant throughout both transition zones and reached a maximum at 60–70 cm depth (together  $5 \pm 1.8\%$  of total counts). Amoebozoa ( $0.9 \pm 0.4\%$ ), especially Lobosa contigs, were most abundant at the top 0–10 cm sample and in TZ1 (Fig. 3D). We tested whether relative abundances of selected prokaryotic taxa and predator contig correlated (SI Fig. 1) but found no significant correlation.

### 3.5. Diversity, ordination, and drivers of trends (ANOSIM)

Shannon alpha diversity reached a maximum at 40 cm depth, with an average  $6.21 \pm 0.18$  for all domains, and decreased with depth below 40 cm (Fig. 4). Protozoan richness reached 72 rRNA contigs at all depths, while 140 bacterial predator rRNA contigs occurred in 28 of 30 triplicates. Principal Component Analysis revealed a clear grouping of the AL samples versus deeper samples, explaining  $43.5 \pm 2.5\%$  of variation on the first axis per tested group (prokaryotes, eukaryotes, bacterial and eukaryotic predators; Fig. 5, NMDS see SI Fig. 2). ANOVA results confirmed this trend with layer explaining most of the variation in the dataset (F.Model = 6.09,  $R^2 = 0.75$ ,  $p = 0.002$ ; Table 3). Except for pH (F.Model = 2.66,  $R^2 = 0.25$ ,  $p = 0.054$ ), age (F.Model = 5.07,  $R^2 = 0.59$ ,  $p = 0.002$ ), SOM (F.Model = 5.01,  $R^2 = 0.39$ ,  $p = 0.001$ ) and H<sub>2</sub>O (F.Model = 5.26,  $R^2 = 0.4$ ,  $p = 0.009$ ) were found significant to explain community dissimilarities. Tukey's HSD tests revealed no significant differences between communities along layer or age categories, except a significant difference between AL and PF samples in the total (adjusted  $p = 0.048$ ), prokaryote (adjusted  $p = 0.048$ ) and protozoan (adjusted  $p = 0.042$ ) community dissimilarities. When we tested, if predator relative abundance significantly shapes the total community, we found that Protozoa most significantly shaped the prokaryotic (F.Model = 3.86,  $R^2 = 0.33$ ,  $p = 0.015$ ), as well as the bacterial predator community (F.Model = 5.65,  $R^2 = 0.41$ ,  $p = 0.017$ ). Meanwhile, bacterial predators had slightly less impact on the prokaryotic (F.Model = 3.34,  $R^2 = 0.29$ ,  $p = 0.03$ ) and protozoan community (F.Model = 3.19,  $R^2 = 0.29$ ,  $p = 0.039$ ).

240 Table 3 ANOVA statistical analysis on mean Bray-Curtis dissimilarities per depths between total community, prokaryotic (prok; \*excluding prokaryotic predators), bacterial  
 241 predators (bacpred), eukaryotic and protozoan (prot) rRNA contigs. These were tested against the environmental parameters of age (14C), layer, soil organic matter (SOM) and  
 242 moisture (H<sub>2</sub>O), pH and the presence of non-predatory (\*) prokaryotes, bacpred and protozoa per depth. The output includes the F-Model values (F), R<sup>2</sup> and P-values (P) < 0.05  
 243 were considered significant and are marked in bold.

| env.<br>Parameter | total |                |              | prok  |                |              | bacpred |                |              | eukaryotes |                |              | prot  |                |              |
|-------------------|-------|----------------|--------------|-------|----------------|--------------|---------|----------------|--------------|------------|----------------|--------------|-------|----------------|--------------|
|                   | F     | R <sup>2</sup> | P            | F     | R <sup>2</sup> | P            | F       | R <sup>2</sup> | P            | F          | R <sup>2</sup> | P            | F     | R <sup>2</sup> | P            |
| <sup>14</sup> C   | 5.069 | 0.592          | <b>0.001</b> | 5.069 | 0.592          | <b>0.001</b> | 6.285   | 0.642          | <b>0.006</b> | 6.906      | 0.664          | <b>0.004</b> | 6.678 | 0.656          | <b>0.002</b> |
| layer             | 6.088 | 0.753          | <b>0.002</b> | 6.088 | 0.753          | <b>0.001</b> | 5.002   | 0.714          | <b>0.006</b> | 6.008      | 0.750          | <b>0.003</b> | 6.881 | 0.775          | <b>0.001</b> |
| SOM               | 5.010 | 0.385          | <b>0.004</b> | 5.010 | 0.385          | <b>0.004</b> | 6.924   | 0.464          | <b>0.009</b> | 6.389      | 0.444          | <b>0.005</b> | 6.072 | 0.432          | <b>0.006</b> |
| H <sub>2</sub> O  | 5.260 | 0.397          | <b>0.009</b> | 5.260 | 0.397          | <b>0.005</b> | 5.691   | 0.416          | <b>0.014</b> | 7.240      | 0.475          | <b>0.007</b> | 7.242 | 0.475          | <b>0.008</b> |
| pH                | 2.655 | 0.249          | 0.054        | 2.655 | 0.249          | 0.059        | 3.430   | 0.300          | 0.057        | 2.803      | 0.259          | 0.065        | 2.897 | 0.266          | 0.059        |
| prok*             | -     | -              | -            | -     | -              | -            | 1.645   | 0.171          | 0.180        | 0.880      | 0.099          | 0.405        | 1.057 | 0.117          | 0.336        |
| bacpred           | -     | -              | -            | 3.336 | 0.294          | <b>0.030</b> | -       | -              | -            | 3.771      | 0.320          | <b>0.032</b> | 3.190 | 0.285          | <b>0.039</b> |
| prot              | -     | -              | -            | 3.857 | 0.325          | <b>0.015</b> | 5.648   | 0.414          | <b>0.017</b> | 4.284      | 0.349          | <b>0.024</b> | -     | -              | -            |

244

## 4. Discussion

### 4.1. RNA:DNA ratio indicates active bloom

The use of total RNA sequencing, such as metatranscriptomics, enables the description of the entire soil community with full-length rRNA sequencing, including prokaryotic and eukaryotic taxa. Especially the relative abundance of Eukarya is often underestimated or removed from metatranscriptomic datasets, but few studies formerly confirmed similar results as in this work with 10% (Tveit et al., 2013; Urich et al., 2008), while another relevant study only found 0.07% fungi as eukaryotes (Hultman et al., 2015). The eukaryotic alpha diversity was similar to former metatranscriptomic permafrost studies (Tveit et al., 2015), or even higher (Hultman et al., 2015), and the overall low fungal abundances could relate to the rapid decrease of fungi upon thaw, as shown before (Schostag et al., 2019). Meanwhile, the co-extraction of DNA also supplies RNA:DNA ratios to infer the overall activity: the total extracted RNA consists mainly of ribosomal RNA, of which ribosomes are responsible for translating messenger (mRNA) into proteins for cell growth. Our findings of higher RNA:DNA ratios at the freshly thawed 50 and 80 cm depth hence indicate a relatively higher ribosomal abundance at these depths. To understand, which taxa are the most active, we here explore fast-growing prokaryotes and all microbial predator abundances.

### 4.2. Dominant prokaryotes in thawing permafrost soil

Overall, Proteobacteria contigs were the most abundant and encompassed the most phylogenetically and metabolically diverse groups. Especially Betaproteobacteria responded strongly to thaw, in line with their formerly documented copiotrophic representatives, responding quickly to freshly available resources (Hurst, 2019; Schostag et al., 2019).

267 Particularly Nitrosomonadales occurred at the first erosion year's maximum thaw depth of 70  
 268 cm. Schostag and colleagues showed that the Nitrosomonadaceae relative abundance  
 269 correlated with nitrogen pools in permafrost soils (Schostag et al., 2019). Here, especially the  
 270 family Gallionellaceae contains nitrate-dependent ferrous iron-oxidising taxa (He et al., 2016)  
 271 and was previously found in partly ancient permafrost (Alawi et al., 2007; Müller et al., 2018;  
 272 Scheel et al., 2022). Notably, most genera with maximum relative abundances at this depth (70  
 273 cm), were putative ammonia oxidizers within Betaproteobacteria. Many of these are  
 274 conditionally rare, but metabolically important taxa, as they can respond rapidly to changing  
 275 environmental factors (Shade et al., 2014). Although nutrient measurements and nitrification  
 276 gene abundance are needed to confirm active gene expression, our results confirm the  
 277 ecological importance of nitrogen cycling in thawing permafrost, as suggested before (Keuper  
 278 et al., 2020; Monteux et al., 2020). Among the Betaproteobacteria, Burkholderiales increased  
 279 steadily towards the second, deepest thaw depth. Most represented by Comamonadaceae, a  
 280 family that consists of many copiotrophic spore formers, rapidly responding to fresh input of  
 281 labile nutrients (Fierer et al., 2007; Ho et al., 2017). This suggests that mineral-weathering  
 282 Burkholderiales (Naylor et al., 2022) are readily responsive to thawing soil conditions. Similarly,  
 283 the active Bacteroidetes order Sphingobacteriales dominated recently thawed permafrost. In  
 284 our study site, this order formerly had the highest relative amplicon-based abundance with  
 285 more than 50% of all counts between 70–90 cm depth in 2020, despite very low abundances  
 286 one year earlier (Scheel et al., 2022). This confirms that this taxon as a major component of the  
 287 microbial community at thawed depths, which responds strongly to thaw (Burkert et al., 2019;

Coolen and Orsi, 2015; Deng et al., 2015; Frank-Fahle et al., 2014) and is abundant at the upper permafrost limit (Müller et al., 2018; Tripathi et al., 2018).

The large taxonomic shifts in the rRNA pool suggest that the ancient carbon that became available due to warmer temperatures at these depths allows decomposers to thrive. Former studies have shown that methane emissions from this site were variable in both space and time during collapse (Scheller et al., 2021), which highlights the potential of a biogenic carbon release.

### 4.3. Thaw layers as strongest abiotic drivers

Our results suggest that while edaphic parameters govern the community, based on age and layer as well as soil moisture, pH did not, which could be due to the very small variation in pH in our study. The active layer contained the highest alpha diversity, where a distinct community had formed over numerous years, in agreement with former findings (Ganzert et al., 2014; Gittel et al., 2014a; Monteux et al., 2018). Many microbial taxa, especially within the predator community, responded rapidly to thaw, after the former ice lens as separation between the active layer and deeper soils thawed. This could enable dispersal into deeper soils, although we expect this to be an overall slow process as we expect an overall still low soil temperature and nutrient availability. An amplicon-based study at this site still confirmed similar emerging drivers, mainly layer and age (Scheel et al., 2022), as the only soil microbial studies performed locally before (Ganzert et al., 2014; Gittel et al., 2014b). Overall, more than half of all counts stem from taxa dominantly present in the thawed layers. Yet, no significant differences were found between the two thawed layers, which suggests that the thawed layers form a gradient between the significantly distinct historic active layer and permafrost communities, rather than

giving rise to a differentiated biome. Although age was as significantly explaining the variance in total community dissimilarities as the layers, we hypothesize that this is due to the complete active layer being of younger age and that those dissimilarities are mainly driven by the different active layer community compared with the rest. As we did not detect significant differences between the age categories, we assume that community changes rather took place across both selected depths within the oldest layers, where the most recent thaw took place. It has been discussed how the thermal state of permafrost depicts clear dispersal limits for water-dependent species such as most prokaryotic taxa. We argue this to be true for the similarly significant impact of soil moisture on the community at the moment of sampling. These edaphic properties depict the rather short-term character of the site. Especially fast-growing species adapt quickly to changing ecosystem parameters, due to their small size and high doubling times. We hypothesize, that this could explain the high RNA content we particularly found in the thawed permafrost material of the rapidly thawing soils, where several taxa quickly adapt to the more suitable conditions of available water and warmer temperatures.

#### **4.4. Predation patterns as a response to thaw dynamics**

We found bacterivores to be among the putatively active community, also within ancient thawing permafrost. Here, the increase of protozoa relative to bacterial predator abundance with recent thaw is largely controlled by the relative increase of protozoan biomass in formerly less inhabited permafrost layers, where myxobacterial abundances did not increase yet. Whether protozoa in these depths were more mobile or originated from resting stages, is not known, but amplicon-based sequencing at this site confirmed the increase of Myxococcales at

the 40–50 cm deep first fresh thaw horizon from 2019 to 2020, the year of sampling for this study. While this trend could stem from preserved rRNA, although possibly not stable for longer than several weeks in thawed soil (Schostag et al., 2020), we do not find the same level of preservation for both kingdoms of predators, indicating a truly active microeukaryotic bloom with permafrost thaw. Our *in situ* approach gives rise to the idea of more mobile predators dominating during the initial stages of the thaw-triggered microbial bloom, while consecutive migration of bacterial predators in later stages of thaw could be possible as well. This shows that abrupt thaw triggers the microeukaryotic community, suggesting an important role of eukaryotic predators during the initial stages after thaw and thus substantially expanding on previous studies of Schostag and colleagues, who found an increased abundance of microeukaryotes during controlled short-term thaw (Schostag et al., 2019).

#### 4.4.1. *Bacterial predators from the active layer*

We found that Myxococcales was the overall most dominant taxonomic order, especially at the interface between the active layer and transition zone. Myxococcales are highly abundant in Arctic soils (Malard and Pearce, 2018), and have been observed at this study site before (Scheel et al., 2022). Bacterial predators and particularly Myxococcales may play key roles in microbial food webs, as recently demonstrated (Dai et al., 2021; Petters et al., 2021). Within the active layer, seasonal prokaryotic blooms support higher prey and predator abundance and we hypothesize that the formation of spore-containing fruiting bodies in Myxococcales (Huntley et al., 2011) offers resistance to the winter freeze-off. In contrast, Bdellovibrionales were found at a deeper thaw depth, which might indicate a higher mobility within the soil profile, based on

their flagellate morphology and the significant impact of soil moisture on migration (Petters et al., 2021).

Bacterial predator abundance explained less variation in the beta diversity of prokaryote abundances than protozoa, which might due to the significantly higher protozoan abundances within the microbial bloom in the transition zone. Furthermore, Myxobacteria were found to select on gram-negative bacteria, while protozoa showed less selective feeding, hence benefiting from gram-positive bacteria (Zhang and Lueders, 2017), which in our samples were especially abundant in thawed depths, including Bacilli and Clostridia, e.g., with Clostridia also an abundant spore former in ancient permafrost (Johnson et al., 2007).

#### 4.4.2. *Protozoa as fast responding predators*

Eukaryotic predators included Cercozoa, Amoebozoa, and Ciliophora in agreement with the few former studies (Schostag et al., 2019; Shatilovich et al., 2009). Members of the eukaryotic predator community responded similarly to permafrost thaw, as Ciliophora and Cercozoa reached maximum abundances at 70 cm depth, responding to the deepest thaw depths in the first erosion year. Interestingly, we expected higher abundances of relatively smaller Cercozoa due to their smaller size and hence faster doubling times (Rønn et al., 2012) at the most recently available thaw horizon at 90 cm. They have been documented to respond quickly to thaw in a matter of days (Schostag et al., 2019), while they were also seen to respond rapidly to temperature increases (Tveit et al., 2015). Our findings match these observations with Cercozoa contributing to more than 2% of total abundance per sample, they dominate the protozoan bloom in thawed layers.

Ciliates and Amoebozoa have been observed in Siberian permafrost previously (Shatilovich et al., 2009). Particularly, the ciliates highly abundant in both transition zones, Spirotrichea and Oligohymenophorea, were also formerly found in ice caves, indicating possible cold adaptation (Mondini et al., 2022). One potential explanation for the high abundance of protozoa in freshly thawed permafrost could be that several cyst- and resting-stage-forming protist taxa have previously responded quickly to environmental changes (Rønn et al., 2012).

#### **4.3. Microbial bloom in thawing soils potentially impacted by coalescence**

A microbial bloom, as indicated by large increases in the RNA:DNA ratio acted as the fundament for a larger and more active microbial food web dominated by protozoan bacterivores in soil that thawed recently and bacterial predators in soil that thawed one year ago.

Our findings suggest differently timed responses to permafrost thaw could indicate relatively slow and steady progression of active layer taxa into thawed layers, as well as rapid microbial blooms at just thawed former permafrost layers and stress the non-linear and complex ecological response of environmentally stressed soil microbiomes in this setting. These results support our hypothesis, that thawed soils can experience a microbial bloom, consisting of predominantly fast-growing taxa. Our study additionally supports earlier findings that show the potential for coalescence, or migration of the active layer into thawed permafrost communities upon transplantation of surface soil microbiome to permafrost (Monteux et al., 2020). Although we could not statistically separate the potential effects of isolated permafrost thaw and coalescence with the active layer community, we hypothesize that these processes both play a role in the thaw zone, as thawed permafrost communities were indistinguishable from both the

permafrost and active layer. In their previous incubation study, Monteux and colleagues could identify abundance changes purely related to thaw, including an increase of Bacteroidetes abundance, apart from coalescence effects stemming from the inoculating soil material (Monteux et al., 2020). In both cases, the processes of thaw and migration have resulted in elevated emissions of greenhouse gases (Monteux et al., 2020), highlighting the importance of understanding community dynamics in response to thaw. Permafrost carbon and nitrogen retention thereby is steered more by community composition than microbial biomass and edaphic properties.

#### 4.5. Conclusion

We have demonstrated microbial responses to abruptly eroding permafrost in Greenland and described shifts in the total community and their abiotic and trophic drivers. The novelty of this work includes both one of the rare *in situ* total active community descriptions in intact and eroding permafrost and highlighting the role of predators in response to a microbial bloom during abruptly thawing of ancient permafrost soil horizons. We found evidence for our hypothesis that the freshly thawed transition zones are dominated by fast-growing taxa, as Nitrosomonadales, Sphingobacteriales, and Burkholderiales were dominant in these depths. We see the potential for coalescence as the main driver of the shallow thawed samples, while a bloom of taxa from permafrost could indicate an additional process. To further explore these questions, we recommend stable isotope probing studies that elucidate the origin and dynamics of fast-responding taxa. On top, we suggest a coupling of sequencing and cultivation studies to quantitatively correlate dominant organism abundances, physiology, trophic relations, and carbon and nitrogen cycling capacities. Finally, nestedness analysis could further

elucidate these opposing dynamics as well as their effect on the ecosystem functioning in vulnerable but abruptly thawing permafrost environments. While total RNA sequencing might remain challenging in remote environments, metagenomic and mRNA-based approaches need to be incorporated into *in situ* studies from multiple geographic locations, to fully link microbial activity to taxonomic insights. Furthermore, we stress the importance of the described predation patterns, as trophic complexities within microbial soil ecosystems highly impact the total stock vulnerability and resilience to further climatic perturbation.

## 5. Acknowledgements

We thank the Zackenberg Research Station and its field assistants for smooth sample handling of the sampling and samples, as well as Tina Thane and Tanja Begovic for advice during laboratory work. MS thanks the VU Amsterdam Ecology group for inspiring and helpful discussions on soil protozoa and microbial ecology.

## 6. Competing interests

The authors declare no competing financial interests.

## 7. Data availability statement

The raw sequence data of this study were deposited in the NCBI Sequence Read Archive and can be accessed through accession number PRJNA853791.

## 8. References

Alawi, M., Lipski, A., Sanders, T., Pfeiffer, E.-M., Spieck, E., 2007. Cultivation of a novel cold-adapted nitrite oxidizing betaproteobacterium from the Siberian Arctic. ISME J. 256–264.

437 <https://doi.org/10.1038/ismej.2007.34>

438 Allison, S.D., Martiny, J.B.H., 2008. Resistance, resilience, and redundancy in microbial  
439 communities. *Proc. Natl. Acad. Sci. U. S. A.* 105, 11512–11519.  
440 <https://doi.org/10.1073/pnas.0801925105>

441 Anwar, M.Z., Lanzen, A., Bang-Andreasen, T., Jacobsen, C.S., 2019. To assemble or not to  
442 resemble—A validated Comparative Metatranscriptomics Workflow (CoMW). *Gigascience*  
443 8, 1–10. <https://doi.org/10.1093/gigascience/giz096>

444 Bardgett, R.D., Caruso, T., 2020. Soil microbial community responses to climate extremes:  
445 Resistance, resilience and transitions to alternative states. *Philos. Trans. R. Soc. B Biol. Sci.*  
446 375. <https://doi.org/10.1098/rstb.2019.0112>

447 Bardgett, R.D., Van Der Putten, W.H., 2014. Belowground biodiversity and ecosystem  
448 functioning. *Nature* 515, 505–511. <https://doi.org/10.1038/nature13855>

449 Burkert, A., Douglas, T.A., Waldrop, M.P., Mackelprang, R., 2019. Changes in the Active, Dead,  
450 and Dormant Microbial Community Structure across a Pleistocene Permafrost  
451 Chronosequence. *Appl. Environ. Microbiol.* 85, 1–16.  
452 <https://doi.org/https://doi.org/10.1128/AEM.02646-18>

453 Christensen, T.R., Lund, M., Skov, K., Abermann, J., Scheller, J., Scheel, M., Lo, E., Langley, K.,  
454 Murphy, M.J., Mastepanov, M., López-Blanco, E., Scheller, J., Scheel, M., Jackowicz-  
455 Korczynski, M., Langley, K., Murphy, M.J., Mastepanov, M., Lo, E., Langley, K., Murphy,  
456 M.J., Mastepanov, M., 2020. Multiple Ecosystem Effects of Extreme Weather Events in the  
457 Arctic. *Ecosystems*. <https://doi.org/10.1007/s10021-020-00507-6>

458 Coolen, M.J.L., Orsi, W.D., 2015. The transcriptional response of microbial communities in

459 thawing Alaskan permafrost soils. *Front. Microbiol.* 6, 1–14.

460 <https://doi.org/10.3389/fmicb.2015.00197>

461 Dai, W., Wang, N., Wang, W., Ye, X., Cui, Z., Wang, J., Yao, D., Dong, Y., Wang, H., 2021.

462 Community Profile and Drivers of Predatory Myxobacteria under Different Compost

463 Manures. *Microorganisms* 9, 1–15.

464 Deng, J., GU, Y., Zhang, J.I., XUE, K., Qin, Y., Yuan, M., YIN, H., ZHILI HE, Wu, L., Schuur, E.A.G.G.,

465 Tiedje, J.M., ZHOU, J., He, Z., Wu, L., Schuur, E.A.G.G., Tiedje, J.M., ZHOU, J., Lansing, E.,

466 Division, S., Berkeley, L., Control, P., Yungfu, G., Zhang, J.I., Xu, K., Qin, Y., Yuan, M.,

467 Huaqun, Y., He, Z., Wu, L., Schuur, E.A.G.G., Tiedje, J.M., ZHOU, J., 2015. Shifts of tundra

468 bacterial and archaeal communities along a permafrost thaw gradient in Alaska. *Mol. Ecol.*

469 24, 222–234. <https://doi.org/10.1111/mec.13015>

470 Elberling, B., Michelsen, A., Schädel, C., Schuur, E.A.G., Christiansen, H.H., Berg, L., Tamstorf,

471 M.P., Sigsgaard, C., 2013. Long-term CO<sub>2</sub> production following permafrost thaw. *Nat. Clim.*

472 *Chang.* 3, 890–894. <https://doi.org/10.1038/nclimate1955>

473 Fierer, N., Bradford, M.A., Jackson, R.B., 2007. Toward an ecological classification of soil

474 bacteria. *Ecology* 88, 1354–1364. <https://doi.org/10.1890/05-1839>

475 Frank-Fahle, B.A., Yergeau, É., Greer, C.W., Lantuit, H., Wagner, D., 2014. Microbial functional

476 potential and community composition in permafrost-affected soils of the NW Canadian

477 Arctic. *PLoS One* 9. <https://doi.org/10.1371/journal.pone.0084761>

478 Ganzert, L., Bajerski, F., Wagner, D., 2014. Bacterial community composition and diversity of

479 five different permafrost-affected soils of Northeast Greenland. *FEMS Microbiol. Ecol.* 89,

480 426–441. <https://doi.org/10.1111/1574-6941.12352>

481 Geisen, S., Hu, S., dela Cruz, T.E.E., Veen, G.F. (Ciska., 2021. Protists as catalyzers of microbial  
482 litter breakdown and carbon cycling at different temperature regimes. ISME J. 15, 618–  
483 621. <https://doi.org/10.1038/s41396-020-00792-y>

484 Geisen, S., Tveit, A.T., Clark, I.M., Richter, A., Svenning, M.M., Bonkowski, M., Urich, T., 2015.  
485 Metatranscriptomic census of active protists in soils. ISME J. 9, 2178–2190.  
486 <https://doi.org/10.1038/ismej.2015.30>

487 Gittel, A., Bárta, J., Kohoutová, I., Mikutta, R., Owens, S., Gilbert, J., Schnecker, J., Wild, B.,  
488 Hannisdal, B., Maerz, J., Lashchinskiy, N., Čapek, P., Šantrůčková, H., Gentsch, N.,  
489 Shibistova, O., Guggenberger, G., Richter, A., Torsvik, V.L., Schleper, C., Urich, T.,  
490 Kohoutova, I., 2014a. Distinct microbial communities associated with buried soils in the  
491 siberian tundra. ISME J. 8, 841–853. <https://doi.org/10.1038/ismej.2013.219>

492 Gittel, A., Bárta, J., Kohoutová, I., Schnecker, J., Wild, B., Čapek, P., Kaiser, C., Torsvik, V.L.,  
493 Richter, A., Schleper, C., Urich, T., Basiliko, N., 2014b. Site- and horizon-specific patterns of  
494 microbial community structure and enzyme activities in permafrost-affected soils of  
495 Greenland. Front. Microbiol. 5, 1–14. <https://doi.org/10.3389/fmicb.2014.00541>

496 Griffiths, B.S., Philippot, L., 2013. Insights into the resistance and resilience of the soil microbial  
497 community. FEMS Microbiol. Rev. 37, 112–129. [https://doi.org/10.1111/j.1574-  
498 6976.2012.00343.x](https://doi.org/10.1111/j.1574-6976.2012.00343.x)

499 He, S., Tominski, C., Kappler, A., Behrens, S., Roden, E.E., 2016. Metagenomic analyses of the  
500 autotrophic Fe(II)-oxidizing, nitrate-reducing enrichment culture KS. Appl. Environ.  
501 Microbiol. 82, 2656–2668. <https://doi.org/10.1128/AEM.03493-15>

502 Ho, A., Di Lonardo, D.P., Bodelier, P.L.E., 2017. Revisiting life strategy concepts in environmental

microbial ecology. *FEMS Microbiol. Ecol.* 93, 1–14. <https://doi.org/10.1093/femsec/fix006>

Hugelius, G., Strauss, J., Zubrzycki, S., Harden, J.W., Schuur, E.A.G.G., Ping, C.L., Schirrmeister, L., Grosse, G., Michaelson, G.J., Koven, C.D., O'Donnell, J.A., Elberling, B., Mishra, U., Camill, P., Yu, Z., Palmtag, J., Kuhry, P., 2014. Estimated stocks of circumpolar permafrost carbon with quantified uncertainty ranges and identified data gaps. *Biogeosciences* 6573–6593. <https://doi.org/10.5194/bg-11-6573-2014>

Hultman, J., Waldrop, M.P., Mackelprang, R., David, M.M., McFarland, J., Blazewicz, S.J., Harden, J., Turetsky, M.R., McGuire, A.D., Shah, M.B., Verberkmoes, N.C., Lee, L.H., Mavrommatis, K., Jansson, J.K., 2015. Multi-omics of permafrost, active layer and thermokarst bog soil microbiomes. *Nature* 521, 208–212. <https://doi.org/10.1038/nature14238>

Huntley, S., Hamann, N., Wegener-Feldbrügge, S., Treuner-Lange, A., Kube, M., Reinhardt, R., Klages, S., Müller, R., Ronning, C.M., Nierman, W.C., Søgaaard-Andersen, L., 2011. Comparative genomic analysis of fruiting body formation in myxococcales. *Mol. Biol. Evol.* 28, 1083–1097. <https://doi.org/10.1093/molbev/msq292>

Hurst, C.J., 2019. *Understanding Terrestrial Microbial Communities, Volume 6.* ed, *Advances in Environmental Microbiology*. Springer, Berlin Heidelberg. <https://doi.org/10.1007/978-3-10777-2>

Inglese, C.N., Christiansen, C.T., Lamhonwah, D., Moniz, K., Montross, S.N., Lamoureux, S., Lafrenière, M., Grogan, P., Walker, V.K., 2018. Examination of Soil Microbial Communities after Permafrost Thaw Subsequent to an Active Layer Detachment in the High Arctic. *Arctic, Antarct. Alp. Res.* 49, 455–472. <https://doi.org/10.1657/AAAR0016-066>

IPCC, 2021. Climate Change 2021: The Physical Science Basis, Intergovernmental Panel on Climate Change (IPCC).

Johnson, S.S., Hebsgaard, M.B., Christensen, T.R., Mastepanov, M., Nielsen, R., Munch, K., Brand, T., Gilbert, M.T.P., Zuber, M.T., Bunce, M., Rønn, R., Gilichinsky, D., Froese, D., Willerslev, E., 2007. Ancient bacteria show evidence of DNA repair. *PNAS* 105, 10631–10631. <https://doi.org/10.1073/pnas.0710637105>

Keuper, F., Wild, B., Kumm, M., Beer, C., Blume-Werry, G., Fontaine, S., Gavazov, K., Gentsch, N., Guggenberger, G., Hugelius, G., Jalava, M., Koven, C., Krab, E.J., Kuhry, P., Monteux, S., Richter, A., Shahzad, T., Weedon, J.T., Dorrepaal, E., 2020. Carbon loss from northern circumpolar permafrost soils amplified by rhizosphere priming. *Nat. Geosci.* 13, 560–565. <https://doi.org/10.1038/s41561-020-0607-0>

Kopylova, E., Noé, L., Touzet, H., 2012. Sequence analysis SortMeRNA: fast and accurate filtering of ribosomal RNAs in metatranscriptomic data. *Bioinformatics* 28, 3211–3217. <https://doi.org/10.1093/bioinformatics/bts611>

Lanzén, A., Jørgensen, S.L., Huson, D.H., Gorfer, M., Grindhaug, S.H., Jonassen, I., Øvreås, L., Urich, T., 2012. CREST – Classification Resources for Environmental Sequence Tags. *PLoS One* 7. <https://doi.org/10.1371/journal.pone.0049334>

Lennon, J.T., Jones, S.E., 2011. Microbial seed banks: The ecological and evolutionary implications of dormancy. *Nat. Rev. Microbiol.* 9, 119–130. <https://doi.org/10.1038/nrmicro2504>

Malard, L.A., Pearce, D.A., 2018. Microbial diversity and biogeography in Arctic soils. *Environ. Microbiol. Rep.* 10, 611–625. <https://doi.org/10.1111/1758-2229.12680>

547 McMurdie, P.J., Holmes, S., 2013. phyloseq : An R Package for Reproducible Interactive Analysis  
548 and Graphics of Microbiome Census Data. PLoS One 8.  
549 <https://doi.org/10.1371/journal.pone.0061217>

550 Metcalfe, D.B., Hermans, T.D.G., Ahlstrand, J., Becker, M., Berggren, M., Björk, R.G., Björkman,  
551 M.P., Blok, D., Chaudhary, N., Chisholm, C., Classen, A.T., Hasselquist, N.J., Jonsson, M.,  
552 Kristensen, J.A., Kumordzi, B.B., Lee, H., Mayor, J.R., Prev  y, J., Pantazatou, K., Rousk, J.,  
553 Sponseller, R.A., Sundqvist, M.K., Tang, J., Uddling, J., 2018. Patchy field sampling biases  
554 understanding of climate change impacts across the Arctic. Nat. Ecol. Evol. 2.  
555 <https://doi.org/10.1038/s41559-018-0612-5>

556 Mondini, A., Anwar, M.Z., Ellegaard-jensen, L., Lavin, P., Jacobsen, C.S., Purcarea, C., 2022. Heat  
557 Shock Response of the Active Microbiome From Perennial Cave Ice. Front. Microbiol. 12,  
558 1–14. <https://doi.org/10.3389/fmicb.2021.809076>

559 Monteux, S., Keuper, F., Fontaine, S., Gavazov, K., Hallin, S., Juhanson, J., Krab, E.J., Revaillet, S.,  
560 Verbruggen, E., Walz, J., Weedon, J.T., Dorrepaal, E., 2020. Carbon and nitrogen cycling in  
561 Yedoma permafrost controlled by microbial functional limitations. Nat. Geosci. 13, 794–  
562 798. <https://doi.org/10.1038/s41561-020-00662-4>

563 Monteux, S., Weedon, J.T., Blume-Werry, G., Gavazov, K., Jassey, V.E.J., Johansson, M., Keuper,  
564 F., Olid, C., Dorrepaal, E., Gavazov, G.B.K., Blume-Werry, G., Gavazov, K., Jassey, V.E.J.,  
565 Johansson, M., Keuper, F., Olid, C., Dorrepaal, E., 2018. Long-term in situ permafrost thaw  
566 effects on bacterial communities and potential aerobic respiration. ISME J. 12, 2129–2141.  
567 <https://doi.org/10.1038/s41396-018-0176-z>

568 M  ller, O., Bang-Andreasen, T., White, R.A., Elberling, B., Ta  , N., Kneafsey, T., Jansson, J.K.,

569 Øvreås, L., Allen, R., Iii, W., Elberling, B., Tas, N., Kneafsey, T., Jansson, J.K., Øvreås, L.,  
570 White, R.A., Elberling, B., Taş, N., Kneafsey, T., Jansson, J.K., Øvreås, L., Allen, R., Iii, W.,  
571 Elberling, B., Tas, N., Kneafsey, T., Jansson, J.K., Øvreås, L., 2018. Disentangling the  
572 complexity of permafrost soil by using high resolution profiling of microbial community  
573 composition, key functions and respiration rates. *Environ. Microbiol.* 20, 4328–4342.  
574 <https://doi.org/10.1111/1462-2920.14348>

575 Nannipieri, P., Ascher, J., Ceccherini, M.T., Landi, L., Pietramellara, G., Renella, G., 2017.  
576 Microbial diversity and soil functions. *Eur. J. Soil Sci.* 68, 12–26.  
577 [https://doi.org/10.1111/ejss.4\\_12398](https://doi.org/10.1111/ejss.4_12398)

578 Naylor, D., McClure, R., Jansson, J., 2022. Trends in Microbial Community Composition and  
579 Function by Soil Depth. *MDPI Microorg.* 10.

580 Oksanen, J., Blanchet, F.G., Friendly, M., Kindt, R., Legendre, P., McGlinn, D., Minchin, P.R.,  
581 O’Hara, R.B., Simpson, G.L., Solymos, P., Stevens, M.H.H., Szoecs, E., Wagner, H., 2020.  
582 *vegan: Community Ecology Package*. R package version 2.5-7.

583 Parmentier, F.-J.W., Christensen, T.R., Rysgaard, S., Bendtsen, J., Glud, R.N., Else, B., Huissteden,  
584 J. Van, Sachs, T., Vonk, J.E., Sejr, M.K., 2017. A synthesis of the arctic terrestrial and marine  
585 carbon cycles under pressure from a dwindling cryosphere. *Ambio* 46, 53–69.  
586 <https://doi.org/10.1007/s13280-016-0872-8>

587 Petters, S., Groß, V., Söllinger, A., Pichler, M., Reinhard, A., Bengtsson, M.M., Urich, T., 2021.  
588 The soil microbial food web revisited: Predatory myxobacteria as keystone taxa? *ISME J.*  
589 15, 2665–2675. <https://doi.org/10.1038/s41396-021-00958-2>

590 Quast, C., Pruesse, E., Yilmaz, P., Gerken, J., Schweer, T., Glo, F.O., Yarza, P., 2013. The SILVA

591 ribosomal RNA gene database project : improved data processing and web-based tools 41,  
592 590–596. <https://doi.org/10.1093/nar/gks1219>

593 Rønn, R., Vestergård, M., Ekelund, F., 2012. Interactions between bacteria, protozoa and  
594 nematodes in soil. *Acta Protozool.* 51, 223–235.  
595 <https://doi.org/10.4467/16890027AP.12.018.0764>

596 Scheel, M., Zervas, A., Jacobsen, C.S., Christensen, T.R., 2022. Microbial Community Changes in  
597 26,500-Year-Old Thawing Permafrost. *Front. Microbiol.* 13, 1–14.  
598 <https://doi.org/10.3389/fmicb.2022.787146>

599 Scheller, J.H., Mastepanov, M., Christiansen, H.H., Christensen, T.R., 2021. Methane in  
600 Zackenberg Valley, NE Greenland: multidecadal growing season fluxes of a high-Arctic  
601 tundra. *Biogeosciences* 18, 6093–6114. <https://doi.org/10.5194/bg-18-6093-2021>

602 Schostag, M., Priemé, A., Jacquiod, S., Russel, J., Ekelund, F., Jacobsen, C.S., 2019. Bacterial and  
603 protozoan dynamics upon thawing and freezing of an active layer permafrost soil. *ISME J.*  
604 13, 1345–1359. <https://doi.org/10.1038/s41396-019-0351-x>

605 Schostag, M.D., Albers, C.N., Jacobsen, C.S., Priemé, A., 2020. Low Turnover of Soil Bacterial  
606 rRNA at Low Temperatures. *Front. Microbiol.* 11, 1–5.  
607 <https://doi.org/10.3389/fmicb.2020.00962>

608 Shade, A., Jones, S.E., Gregory Caporaso, J., Handelsman, J., Knight, R., Fierer, N., Gilbert, J.A.,  
609 2014. Conditionally rare taxa disproportionately contribute to temporal changes in  
610 microbial diversity. *MBio* 5. <https://doi.org/10.1128/mBio.01371-14>

611 Shade, A., Peter, H., Allison, S.D., Baho, D.L., Berga, M., Bürgmann, H., Huber, D.H.,  
612 Langenheder, S., Lennon, J.T., Martiny, J.B.H., Matulich, K.L., Schmidt, T.M., Handelsman,

613 J., 2012. Fundamentals of microbial community resistance and resilience. *Front. Microbiol.*  
614 3, 1–19. <https://doi.org/10.3389/fmicb.2012.00417>

615 Shatilovich, A. V., Shmakova, L.A., Mylnikov, A.P., Gilichinsky, D.A., 2009. Ancient Protozoa  
616 Isolated from Permafrost. *Permafr. Soils* 97–115. [https://doi.org/10.1007/978-3-540-](https://doi.org/10.1007/978-3-540-69371-0_8)  
617 69371-0\_8

618 Tarnocai, C., Canadell, J.G., Schuur, E.A.G.G., Kuhry, P., Mazhitova, G., Zimov, S., Tarnocai, C.,  
619 Canadell, J.G., Schuur, E.A.G.G., Kuhry, P., Mazhitova, G., Zimov, S., Tamocai, C., Canadell,  
620 J.G., Schuur, E.A.G.G., Kuhry, P., Mazhitova, G., Zimov, S., Tarnocai, C., Canadell, J.G.,  
621 Schuur, E.A.G.G., Kuhry, P., Mazhitova, G., Zimov, S., Tamocai, C., Canadell, J.G., Schuur,  
622 E.A.G.G., Kuhry, P., Mazhitova, G., Zimov, S., 2009. Soil organic carbon pools in the  
623 northern circumpolar permafrost region. *Global Biogeochem. Cycles* 23, 1–11.  
624 <https://doi.org/10.1029/2008GB003327>

625 Thakur, M.P., Geisen, S., 2019. Trophic Regulations of the Soil Microbiome. *Trends Microbiol.*  
626 27, 771–780. <https://doi.org/10.1016/j.tim.2019.04.008>

627 Tripathi, B.M., Kim, M., Kim, Y., Byun, E., Yang, J.W., Ahn, J., Lee, Y.K., 2018. Variations in  
628 bacterial and archaeal communities along depth profiles of Alaskan soil cores. *Nat. Sci.*  
629 Reports 8, 1–11. <https://doi.org/10.1038/s41598-017-18777-x>

630 Turetsky, M., Abbott, B., Jones, M., Walter Anthony, K.M., Olefeldt, D., Schuur, E.A.G., Grosse,  
631 G., Kuhry, P., Hugelius, G., Koven, C.D., Lawrence, D.M., Gibson, C., Sannel, A., McGuire,  
632 A.D., 2020. Carbon release through abrupt permafrost thaw. *Nat. Geosci.* 13, 138–143.  
633 <https://doi.org/10.1038/s41561-019-0526-0>

634 Tveit, A.T., Schwacke, R., Svenning, M.M., Urich, T., 2013. Organic carbon transformations in

high-Arctic peat soils : key functions and microorganisms. ISME J. 7, 299–311.

<https://doi.org/10.1038/ismej.2012.99>

Tveit, A.T., Urich, T., Frenzel, P., Marianne, M., Tveit, A.T., Urich, T., Frenzel, P., Svenning, M.M.,

2015. Metabolic and trophic interactions modulate methane production by Arctic peat

microbiota in response to warming. Proc. Natl. Acad. Sci. U. S. A. 112, E2507–E2516.

<https://doi.org/10.1073/pnas.1420797112>

Urich, T., Lanzén, A., Qi, J., Huson, D.H., Schleper, C., Schuster, S.C., Urich, T., Lanze, A., 2008.

Simultaneous assessment of soil microbial community structure and function through

analysis of the meta-transcriptome. PLoS One 3.

<https://doi.org/10.1371/journal.pone.0002527>

Xue, Y., Lanzén, A., Jonassen, I., 2020. Sequence analysis Reconstructing ribosomal genes from

large scale total RNA meta-transcriptomic data. Bioinformatics 36, 3365–3371.

<https://doi.org/10.1093/bioinformatics/btaa177>

Zhang, L., Lueders, T., 2017. Micropredator niche differentiation between bulk soil and

rhizosphere of an agricultural soil depends on bacterial prey. FEMS Microbiol. Ecol. 93, 1–

11. <https://doi.org/10.1093/femsec/fix103>

## 9. Figure descriptions

Figure 1 (A) Sampling site Zackenberg in Northeast Greenland, credit: Google Earth. (B) Sampling site in 2018 after initial permafrost collapse. (C) Soil profile from the surface until still frozen depth at 90 cm during sampling in 2020. (D) Scheme of abrupt permafrost thaw (indicated with blue arrows), depicting the soil profile until the permafrost (PF) layer at 90–100 cm depth from the moment of collapse in 2018 with visible ice lens below long-term active layer (AL) to the formation of transition zones (TZ, = thawed permafrost).

Figure 2 (A) Dry weight (DW) normalised RNA:DNA ratio per gram sample was indicated for each extraction triplicate and the resulting mean. The mean co-extracted DNA (B) and RNA (C) content in ng/μl per g DW per depth as measured using TapeStation assays. Whiskers indicate the standard deviation among the extraction triplicates.

Figure 3 Bar plot indicating the relative mean abundance per depth. The brackets indicate the next lower taxonomic level of (A) prokaryotic classes with < 1% of total community relative abundance, (B) bacterial predator families, (C) eukaryotic kingdoms, and (D) protozoan phyla.

Figure 4 Shannon alpha diversity for prokaryotes (A), bacterial predators (B), and protozoa (C) given as boxplots with whiskers indicating standard deviation, shapes indicating the layer of samples (AL = active layer; TZ1, TZ2 = transition zone 1 and 2; PF = permafrost), while colours indicate age categories (AY = young age in blue; AM = medium age in green; AO = old age in red, see also Table 1).

671 Figure 5 Principal component analysis (PCoA) ordination plots performed on relative rRNA  
 672 contig abundances per sample for (A) prokaryotes, bacterial predators (B), eukaryotes (C), and  
 673 protozoa (D). Environmental parameters here are given as layer (active layer AL, transition zone  
 674 1 TZ1 and 2 TZ2, and permafrost PF) as well as age with young soils (AY), 2 634–3 770-year-old  
 675 soil of medium age (AM), and old material (AO) of up to 22 100–26 500 years age.



**A**RNA<sub>2</sub>/RNA<sub>1</sub> by RNAi post-replication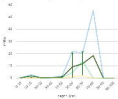

control RNAi-1  
RNAi-2 RNAi-3

**B**

RNAi control post 12 hr

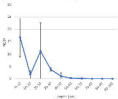**C**

RNAi control post 12 hr

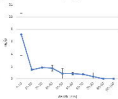



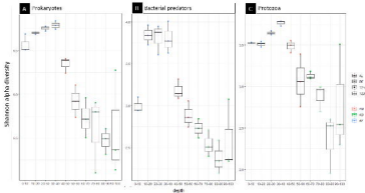

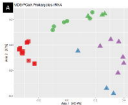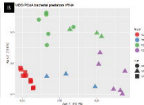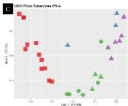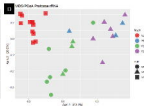

Source: https://www.biorxiv.org/content/10.1101/2022.08.09.499897v1.full.pdf
